20

## 21 **Abstract**

22       The nitrogen (N) cycle represents one of the most well studied systems yet the  
 23 taxonomic diversity of the organisms that contribute to it is mostly unknown, or  
 24 linked to poorly characterized microbial groups. While progress has allowed  
 25 functional groups to be refined, they still rely on *a priori* knowledge of enzymes  
 26 involved, and the assumption of functional conservation, with little connection to the  
 27 role the transformation plays for specific organisms. Here, we use soil microcosms to  
 28 test the impact of N deposition on prokaryotic communities. By combining chemical,  
 29 genomic and transcriptomic analysis we are able to identify and link changes in  
 30 community structure to specific organisms catalyzing given chemical reactions. Urea  
 31 deposition led to a decrease in prokaryotic richness, and a shift in community  
 32 composition. This was driven by replacement of stable native populations, which  
 33 utilize energy from N-linked redox reactions for physiological maintenance, with fast  
 34 responding populations that use this energy for growth. This model can be used to  
 35 predict response to N disturbances and allows us to identify putative life strategies of  
 36 different functional, and taxonomic, groups thus providing insights into how they  
 37 persist in ecosystems by niche differentiation.

38

39

## 40 **Introduction**

41           Modern microbiology techniques have given us unprecedented access to the  
42 microbial world (Spiro 2012; Rinke *et al.* 2013), yet soil microbial communities  
43 remain poorly understood (Delmont *et al.* 2015). While many studies have focused on  
44 the diversity or abundance of key populations (Taylor *et al.* 2012; Wei *et al.* 2015;  
45 Gubry-Rangin *et al.* 2015), fewer have looked at the transcriptional profiles over time  
46 (Nicol *et al.* 2008; Morales & Holben 2013), and even less have done so for multiple  
47 groups at the same time (Liu *et al.* 2010; 2014; Brenzinger *et al.* 2015). This is  
48 particularly true of organisms involved in nitrogen (N) cycling in soils. The  
49 complexity of the underlying processes combined with the diversity of microbes  
50 contributing to each process provides a large challenge to identifying mechanisms  
51 active at any given time (Butterbach-Bahl *et al.* 2013). Currently we lack enough  
52 information to understand basic ecological concepts linked to N cycling *in situ* such  
53 as: i) substrate competition at both inter and intra species level, ii) full diversity of  
54 both present and active N cycling populations, iii) and the life strategies of these  
55 populations which in turn control their responses (both as observed growth or  
56 transcriptional changes).

57           The initial discovery of ammonia oxidizing archaea (AOA) and recognition as  
58 important players in the N cycle (Leininger *et al.* 2006; Hatzenpichler 2012; Stahl &  
59 la Torre 2012) highlighted the unexpected gaps in knowledge. Later studies have  
60 suggested different life strategies for AOA when compared to ammonia oxidizing  
61 bacteria (AOB) (Sterngren *et al.* 2015), but this may be complicated by variance  
62 across strains (Bayer *et al.* 2015). One major unknown is whether observations made  
63 in studies, or organisms, from one ecosystem translate to others.

64           It is well established that individual intermediates in the N cycle can be used  
65   for specific reasons (i.e. ammonia oxidation provides electrons, while denitrification  
66   intermediates accept reducing equivalents), but the purpose of the reactions for any  
67   organism is another major unknown. That is, while some organisms carry out these  
68   processes for electrogenic purposes that can result in growth, others do it in order to  
69   maintain redox homeostasis (e.g. to dissipate excess reductants) (Green & Paget  
70   2004). Unfortunately examples where an organism harbours multiple versions of the  
71   same enzyme for completely different purposes (respiration vs. redox balance) exist  
72   (Hartsock & Shapleigh 2011), and are likely to limit generalizations.

73           Despite this, studies focusing on population changes in response to  
74   manipulations have consistently recorded conserved patterns (e.g. growth of AOB but  
75   not AOA (Jia & Conrad 2009; Di *et al.* 2009; Pratscher *et al.* 2011)) suggesting that  
76   responses by specific populations in a given location or ecosystem are predictable.  
77   However, the debate continues on whether niche specialization and differentiation can  
78   be determined based solely on correlations, without analyzing the wider array of  
79   processes that contribute or influence any given N transformation (Prosser & Nicol  
80   2012). This is relevant in ecosystems such as agricultural grassland where an  
81   understanding of N cycling is crucial for management of both productivity and  
82   greenhouse gases (Herrero *et al.* 2016), of which nitrous oxide (N<sub>2</sub>O) is a key player  
83   (Reay *et al.*, 2012).

84           In grazed pastures (i.e. agricultural grasslands) N deposition through ruminant  
85   urine drives the emissions of N<sub>2</sub>O (Saggar *et al.* 2013). In this system a full cascade of  
86   transformations begin with urea and can result in accumulation of any intermediate  
87   depending on conditions, but with a final end product of N<sub>2</sub> or N<sub>2</sub>O. While the  
88   chemical transformations have been explored (Hamonts *et al.* 2013; Baral *et al.* 2014;

de Klein *et al.* 2014a; b), mechanistic understanding of the populations catalyzing the reactions, and the purpose they serve for the organisms is less clear. In this study, we aimed to identify active N-transformation pathways as well as changes in microbial populations/taxa abundance and transcriptional activity for organisms involved in N loss (through gases) in response to urea (simulated ruminant urine deposition event) and varying moisture content. Observed chemical transformations were linked to changes in genotype (functional potential through DNA; a proxy for population changes), expression of genotype (RNA profiles), and total community composition (specific taxonomically defined populations based on the 16S ribosomal rRNA gene). We hypothesized that sequential transformation of nitrogenous intermediates would be coupled to changes in expression of functional genes catalyzing production and consumption of intermediates. Alternatively, transformations not linked to population, or expression changes, would be driven by other (abiotic) pathways. We also hypothesized that changes in transcription, or population size, could serve to determine life strategies of microbes utilizing each intermediate (whether they are used for growth vs. physiological maintenance). To test this we mimicked a ruminant urine-N deposition event using repacked soil cores (soil bulk density= 1.1 Mg m<sup>-3</sup>) on tension tables monitored for 63 days. Soils were treated with urea under two different moisture contents: high (near saturation; -1.0 kPa) and low (field capacity; -10 kPa) moisture. Simultaneous measurements of soil chemistry, gas kinetics, microbial community composition (by 16S rRNA gene amplicon sequencing) and functional gene abundance (for nitrification and denitrification) at DNA (gene) and RNA (transcript) levels were performed to determine the active populations and pathways.

## 114 **Materials and methods**

### 115 *Sample collection and experimental design*

116 A detailed methodology can be found in (Clough *et. al.*, In review). In brief,  
 117 soil was collected from a permanently grazed agricultural grassland (dairy pasture) in  
 118 March (early spring) at the Teagasc Moorepark Research Centre, County Cork,  
 119 Ireland (8°15'W, 52°9'N). The soil is classified as a Typical Brown earth from the  
 120 Clashmore Series (Gardiner & Radford 1980). Soil was sampled after the turf was  
 121 removed and a spade was used to randomly sample the A-horizon (5-20 cm depth,  
 122 excluding grass layer). To avoid fresh N loading, fields had not been grazed for over a  
 123 month. Field moist samples were immediately shipped to Lincoln University, New  
 124 Zealand and kept at 4°C until processed. Prior to use, soil was sieved ( $\leq 2$  mm) to  
 125 remove any stones, plant roots or earthworms and packed into stainless steel rings  
 126 (7.3 cm internal diameter, 7.4 cm deep) to a depth of 4.1 cm at *in situ* soil bulk density  
 127 ( $1.1 \text{ Mg m}^{-3}$  with a gravimetric water content ( $\theta_g$ ) of  $0.24 \text{ g water g}^{-1} \text{ soil}$ ). The  
 128 resulting cores had a total porosity of  $0.58 \text{ cm}^3 \text{ pores cm}^{-3} \text{ soil}$  and were arranged in a  
 129 factorial experiment replicated four times. Soil cores were maintained at two moisture  
 130 contents: high (near saturated; -1.0 kPa) and low (field capacity; -10 kPa) moisture  
 131 using tension tables (Romano et al., 2002). These moisture contents, -1 and -10 kPa  
 132 respectively, corresponded to 53% and 30% volumetric water content, or 91% and  
 133 52% water-filled pore space (WFPS). Nitrogen was applied as a urea solution at 2141  
 134 kg urea/ha dry soil (equivalent to a single urination event at the higher rate expected  
 135 under bovine urine deposition of  $1000 \text{ kg N ha}^{-1}$ ). Four treatments in total were  
 136 carried out (replicated four times each for a total of 112 cores analyzed) representing  
 137 two levels of urea and two levels of moisture: urea + high moisture (HM +N; Urea \_-  
 138 1.0kPa), urea + low moisture (LM +N; Urea \_-10kPa), no urea + high moisture (HM

139 –N; No Urea \_-1.0kPa) and no urea + low moisture (LM –N; No Urea\_-10kPa). All  
140 cores were held at 20°C for a period of 63 days.

141

#### 142 *Soil pH, and inorganic-N measurements*

143 Soil pH was monitored throughout the experiment using a flat surface pH  
144 electrode (Broadley James Corp., Irvine, California). Inorganic N concentrations  
145 ( $\text{NH}_4^+$ ,  $\text{NO}_2^-$ ,  $\text{NO}_3^-$ ) were determined by destructively sampling batches of soil cores.  
146 Each core was homogenized and a subsample was extracted (10 g dry soil: 100 ml 2M  
147 KCl shaken for 1 hour), filtered (Whatman 42) and analyzed using flow injection  
148 analysis (Blakemore et al., 1987).  $\text{N}_2\text{O}$  flux was determined by placing a soil core into  
149 a 1-L stainless steel tin fitted with a gas-tight lid and rubber septa. The headspace was  
150 sampled after 15 and 30 minutes and analyzed using an automated gas chromatograph  
151 (8610; SRI Instruments, Torrance, CA), linked to an autosampler (Gilson 222XL;  
152 Gilson, Middleton, WI) as previously described (Clough et al., 2006).

#### 153 *Nucleic acids extraction*

154 Samples for RNA and DNA extraction were collected simultaneously with  
155 samples for inorganic N analysis, but only samples at 0, 7, 14, 21, 35, 63 days were  
156 processed for nucleic acids. Each biological replicate was extracted and analyzed  
157 separately. For each extraction 2 g (wet weight) of soil were processed using the  
158 PowerSoil Total RNA Isolation and DNA Elution Accessory Kits (MoBio, Carlsbad,  
159 CA) as per manufacturer's instructions, with slight modifications. Bead beating was  
160 done in a Geno/Grinder 2010 (SPEX SamplePrep, LLC, Metuchen, NJ) using two  
161 rounds of beating (1750 strokes/min) for 15 s with a 1 min pause in between. The  
162 total elution volume for RNA and DNA was 60 µl and 100 µl respectively. RNA was

163 treated with DNase I (RNase-Free) (New England Biolabs, USA) as per the  
164 manufacturer's protocol. RNA quality was assessed by denaturing gel electrophoresis.  
165 RNA and DNA concentration, purity and humic acid contamination were determined  
166 using a Nanodrop Spectrophotometer, ND-1000 (Thermo Scientific). All extractions  
167 were stored at -80 °C until downstream analyses.

168

#### 169 *Reverse transcription (RT)*

170 Triplicate cDNA conversions (technical replicates) were performed for each  
171 RNA extraction using the Maxima H Minus First Strand cDNA Synthesis Kit  
172 (Thermo Scientific) according to manufacturer's protocol. Each 20 µl reaction  
173 contained: 13 µl of RNA (208 ng Total RNA), 1 µl of random hexamers (100 pmol),  
174 1µl of dNTP mix (0.5 mM final conc.) and 5 µl of master mix (4 µl of 5X RT buffer  
175 and 1 µl Maxima H Minus reverse transcriptase). All technical replicates for a sample  
176 were combined and stored at -80°C until further analysis. All further analyses were  
177 performed on the same cDNA pool for each sample.

178

#### 179 *16S rRNA gene amplicon sequencing*

180 16S rRNA gene amplicon sequencing was performed using primers  
181 515F/806R (V4 region of the 16S gene) and the Earth Microbiome Project conditions  
182 (Version 4\_13) (Caporaso *et al.* 2012). All samples were run simultaneously on a  
183 single Illumina MiSeq run. Sequences were first processed in Qiime (version 1.9.1)  
184 using default parameters (Caporaso *et al.* 2010). Sequences were clustered into  
185 Operational Taxonomic Units (OTUs) at 97% sequence similarity using the SILVA



(version 119) reference library (Quast *et al.* 2012) and UCLUST (Edgar 2010) following the open-reference Operational Taxonomic Unit (OTU) picking protocol. Taxonomic identification was done using BLAST against the SILVA database (max-e value = 0.001) (Altschul *et al.* 1990). Subsampling and rarefactions (10 times) were performed to equal read depths of 7,400 per sample, and samples below that threshold were removed. After rarefaction, all 10 OTU tables were merged and exported for further processing in R (R Development Core Team 2008). The 16S amplicon sequences are available in the NCBI SRA database (accession numbers SRP091980).

194

#### 195 *Quantification of gene and transcript abundance*

196 Quantitative PCR (qPCR) was performed in 384-well plates using the ViiA7  
197 real-time PCR system (Applied Biosystems, Carlsbad, CA). Absolute quantification  
198 was done using a 10-fold serial dilution ( $10^8$  to  $10^1$ ) of known copy numbers of  
199 pGEM-T easy (Promega, Madison, Wisconsin, USA) cloned templates as standards.  
200 For all targets qPCR runs included cloned standards, no template control and no  
201 reverse transcription controls (RNA) run in triplicate. No inhibition or positive  
202 amplification on negative controls was observed for any target. All DNA and cDNA  
203 samples were run in quadruplicates to determine abundance of: prokaryotes (16S  
204 rRNA gene), ammonia oxidizers (archaeal [AOA] & bacterial [AOB] ammonia  
205 monooxygenase gene; *amoA*), denitrifiers (cytochrome cd1-type nitrite reductase  
206 gene; *nirS*, and Clade I nitrous oxide reductase gene; *nosZI*) and nitrogen fixers  
207 (nitrogenase gene; *nifH*).

208 All reactions were performed in 10  $\mu$ l volumes containing: 1 $\times$  Master Mix  
209 (Fast SYBR Green Master Mix, ABI), 0.2-0.6  $\mu$ M of each primer [0.2  $\mu$ M for AOA

(Tournai *et al.* 2008), 0.6  $\mu$ M for AOB (Rotthauwe *et al.* 1997; Avrahami *et al.* 2003);  
 0.5  $\mu$ M for 16S rRNA (Hartman *et al.* 2009); *nirS* (Throbäck *et al.* 2004; Yergeau *et al.* 2007), *nosZI* (Henry *et al.* 2006) & *nifH* (Rösch & Bothe 2005)], 2  $\mu$ l of template  
 [DNA (1 ng total) or cDNA (80 $\times$  diluted RT reaction, i.e. total 0.13 ng RNA)] and  
 autoclaved Milli-Q H<sub>2</sub>O to a final volume of 10  $\mu$ l. Primers and qPCR conditions are  
 summarized in Table S1. A melt curve analysis (95°C for 15 s, 60°C for 1 min then  
 increasing 0.05°C/s (data acquisition) until 95°C) was performed to test for specificity  
 and to confirm no amplification in the negative controls.

218

## 219 *Statistical analyses*

All statistical analyses were performed in R (R Development Core Team 2008)  
 using the phyloseq (McMurdie & Holmes 2013), pvclust (Suzuki & Shimodaira  
 2006), vegan (Oksanen *et al.*) and mpmcorrelogram packages. Detailed descriptions  
 can be found in supplemental methods.

224

## 225 *Growth rate estimation and prediction of rRNA operon (rrn) copy numbers*

*rrn* copy numbers for identified OTUs were predicted using the ribosomal RNA  
 operon copy number database (rrnDB) (Stoddard *et al.* 2015). For each OTU,  
 information from the closest strain available was selected. In instances where a  
 closely related organism was not available, the mean copy number for the closest  
 taxonomic group (i.e. genus, class, etc.) was used. Copy numbers were then  
 compared to the maximum observed abundance and the maximum observed fold  
 change (calculated based on lowest observed abundance for the same organism in a  
 preceding time point for OTUs showing growth or succeeding time points for those

decreasing in abundance). An estimated growth rate was calculated for OTUs showing increases in population size in response to N using the following formula:

$$N_t = N_0 \cdot e^{rt}$$

where:  $N_t$ : The amount at time t;  $N_0$ : The amount at time 0; r: exponential growth rate; t: Time passed

#### *Fit model for rrn copy numbers*

Both non-linear (Michaelis-Menten) and linear regressions were used to fit *rrn* copy numbers and population changes (i.e. maximum abundance and fold-change), and growth rate (per day). The fit model was performed in R using “drc” and “ggplot2” packages.

## **Results:**

### *Soil pH and N transformation dynamics in response to urea*

Soil pH increased from acidic (pH =  $5.5 \pm 0.1$ , i.e. mean  $\pm$  SD) to alkaline reaching a maximum (pH =  $8.7 \pm 0.2$ ) at day 3 in urea treated soils. Return to baseline pH was modulated by soil moisture with high moisture (HM; -1.0kPa) soil reaching baseline at day 35 and low moisture soils (LM; -10kPa) doing so at day 53 (Fig. 1). This shift in pH was linked to a successive N transformation process initiated with urea hydrolysis and leading to nitrification and denitrification: urea  $\rightarrow$   $\text{NH}_4^+$   $\rightarrow$   $\text{NO}_2^-$   $\rightarrow$   $\text{NO}_3^-$   $\rightarrow$   $\text{N}_2\text{O}$   $\rightarrow$   $\text{N}_2$  (Fig. 1). Sequential peak activity was observed for each transformation with the response modified by moisture. Maximum production (mean  $\mu\text{g N g}^{-1}$  soil) for each transformation was observed at day 3, 21 and 35 respectively

for  $\text{NH}_4^+$  (HM+N = 1758; LM+N= 1730),  $\text{NO}_2^-$  (HM+N = 79.2; LM+N= 39.7) and  
 $\text{NO}_3^-$  (HM+N = 429.2; LM+N= 335). Two distinct production peaks were observed  
for  $\text{N}_2\text{O}$ , with a short pulse (0 to 5 days) reaching a maximum at day 2 for HM soils  
(11602.8  $\mu\text{g m}^{-2} \text{h}^{-1}$ ) and day 3 for LM soils (46.8  $\mu\text{g m}^{-2} \text{h}^{-1}$ ) (Fig. 1 and  
Supplementary Fig. S1). A second, longer duration (10 to ~50 days),  $\text{N}_2\text{O}$  pulse  
reached a maximum at day 28 for HM soils (6405.1  $\mu\text{g m}^{-2} \text{h}^{-1}$ ) and day 30 for LM  
soils (448.9  $\mu\text{g m}^{-2} \text{h}^{-1}$ ). The large  $\text{N}_2\text{O}$  spike (first peak) between days 0 to 5 in the  
HM+N treatment was about 11.6% of the total  $\text{N}_2\text{O}$  cumulative flux over 63 days,  
whereas in the LM+N treatment the 0 to 5 day periods accounted for 22.3% of the  
total  $\text{N}_2\text{O}$  cumulative flux over 63 days.

267

## 268 *Population and transcription dynamics for nitrogen related functional groups*

Significant changes (ANOVA,  $p < 0.05$ ) in relative activity (mRNA  
abundance/16S rRNA gene abundance) were observed promptly between day 0 & 3  
for all functional groups (except AOA and N-fixers in HM soil) in response to urea  
(Fig. 1). However, maximum relative transcription did not match maximum  
production peaks for corresponding substrates, or products, for each functional group.  
Nitrifiers (ammonia oxidizers) displayed niche differentiation, with time, length and  
strength of response differing between bacterial (AOB) and archaeal ammonia  
oxidizers (AOA). Relative activity of AOA increased (4.6-fold for LM and 1.6-fold  
for HM) under urea treatments at day 3 only, with a subsequent decrease (-19.3-fold  
for LM and -7-fold for HM) resulting in lower expression than in untreated soils (Fig.  
1). AOB relative activity also increased but was sustained for a much longer period  
(3-63 days), with maximum activity (>11-fold change) seen at 21 and 35 days for

281 HM+N and LM+N respectively (Fig. 1). Denitrifiers (both nitrite and nitrous oxide  
282 reducers) showed similar responses as AOA, with peak activity at day 3 and a rapid  
283 return to baseline, in the case of nitrite reducers decreasing to levels below those  
284 observed in non-urea treated soils (Fig. 1). To account for endogenous sources of N,  
285 N<sub>2</sub> fixers were monitored through the activity of the nitrogenase gene (*nifH*). No  
286 significant changes were observed except for day 3 (LM +N only), with a subsequent  
287 decrease in activity below background. This decrease below background was  
288 observed for all N treated samples.

289 Changes in the relative contribution to total community composition were  
290 calculated by normalizing functional gene abundance to total 16S rRNA gene  
291 abundance per sample for each functional group (Fig. 1). The maximum observed  
292 relative abundance of each functional group differed for each group (HM and LM  
293 respectively): AOB, 19 & 12 %; AOA, 8 & 13 %; *nirS*, 6.3 & 2.9 %; *nosZI*, 3.3 & 3.4  
294 %; *nifH*, 4.7 & 4.32 %. Further, large population changes over time were mostly  
295 limited to AOB. Generally, AOB comprised <1 % of the total community, but in  
296 response to urea increased up to 29-fold to make up 19 % (day 21 for HM) and 20-  
297 fold to make up 12 % (day 35 for LM) of the community in urea treated soils. In  
298 contrast, AOA were found at consistently high levels (median=4.2 %) in untreated  
299 soils, but numbers decreased >7-fold in response to urea (~1.3 % at least 63 day).  
300 Similarly, other functional groups (*nosZI*, *nifH*) decreased or remained stable (*nirS*) in  
301 response to urea. Similar patterns for both activity and population changes were  
302 observed when absolute values were analyzed (Supplementary Fig. S2).

303

304 *N deposition induces both a genotypic and a transcriptional response at the*  
 305 *community level that is modified by soil moisture content*

306 Urea deposition imposed a general negative selective pressure leading to  
 307 decreases in OTU level prokaryotic diversity (Shannon, -1.2-fold change), richness (-  
 308 1.5-fold change) and evenness (-1.1-fold change) at DNA level (Fig. 2a,  
 309 Supplementary Fig. S3). The same pattern was observed when active microbes (based  
 310 on RNA) were analyzed with decreases in OTU level prokaryotic diversity (Shannon,  
 311 -1.3-fold change), richness (-1.9-fold change) and evenness (-1.2-fold change).  
 312 Moisture was found to have a smaller, but significant, effect compared to urea, with  
 313 LM samples consistently resulting in lower diversity and richness when compared to  
 314 their HM pairs. Richness and diversity losses were not recovered even after 63 days.  
 315 In contrast, samples where no urea was applied remained stable (i.e. constant diversity  
 316 and richness).

317 Urea deposition significantly altered community structure (Adonis test:  $F=$   
 318 18.04,  $p < 0.001$  for 16S rDNA and  $F= 26.27$ ,  $p < 0.001$  for 16S rRNA) as shown in a  
 319 non-metric multidimensional scaling (NMDS) plot using a Bray-Curtis dissimilarity  
 320 matrix (Fig. 2b and Supplementary Fig. S4). At both DNA and RNA level community  
 321 changes along the first axis corresponded with changes in response to urea treatment,  
 322 with the second axis accounting for changes in moisture. A pvclust analysis  
 323 (hierarchical clustering with p-values calculated via multiscale bootstrap resampling,  
 324 Supplementary Fig. S5) confirmed two major clusters [100% AU (Approximately  
 325 Unbiased) and 100% BP (Bootstrap Probability)] formed by urea treated (HM+N and  
 326 LM+N samples, excluding day 0), vs. untreated soils (HM-N, LM-N, field samples,  
 327 and HM+N & LM+N at Day 0). Temporal variance within each cluster was

confirmed using a Mantel correlogram analysis (Fig. 2c). Urea treated samples had significant changes in community composition immediately upon treatment (Day 0 to 7), with no return to baseline conditions by the end of the experiment. In contrast, untreated samples did not change significantly over time (Supplemental Fig. S6)

Changes in community structure were associated with shifts in major taxonomic lineages (Fig. 3). In general, phylum level changes in abundance and transcription were correlated to each other (Supplementary Table S2 and Fig. S7, S8). Urea deposition induced temporal changes in phylum level abundance with observed maximum fold changes per group (HM & LM at DNA level) being: Acidobacteria, -4.6 & -3.7; Actinobacteria, 2.4 & 5.3; Bacteroidetes, 4.6 & 2.2; Candidate Division WS3, -10.5 & -7; Chloroflexi, -2.9 & -2.6; Firmicutes, 10.8 & 16.2; Gemmatimonadetes, 2 & 3.3; Nitrospirae, -3.2 & -2; Planctomycetes, -3.7 & -2.5; Thaumarchaeota, -5.2 & -3.6; Verrucomicrobia, -2.5 & -2; Alphaproteobacteria, 1.4 & 1.7; Betaproteobacteria, 4 & 2; Deltaproteobacteria, -2.2 & -1.4; Gammaproteobacteria, 1.5 & 2.6. Normalized transcriptional activity (reads of 16S rRNA/reads of 16S rDNA) identified the Firmicutes and members within classes of the Proteobacteria as the most transcriptionally active. While abundant phyla tended to have high levels of normalized transcription, less abundant organisms like the Thaumarchaeota, were observed to have high normalized transcriptional activity especially under background conditions (Supplementary Fig. S7). In contrast, groups traditionally considered slow growers (e.g. Nitrospirae and Gemmatimonadetes) had low normalized transcription. It was also noted that while normalized transcription levels remained stable without urea, N deposition induced changes. These changes in normalized activity did not always match trends observed at individual DNA or RNA level (e.g. Firmicutes).

353

354 *Shifts in N and moisture status trigger OTU response linked to divergent life*  
 355 *strategies*

356

357 Since Fig. 3 only represents a taxonomic summary of all OTUs (irrespective  
 358 of their response to treatments), it does not provide a clear indication of who is  
 359 changing and why. To account for this, urea responsive OTUs were identified  
 360 independently in RNA and DNA profiles (under each treatment) through a SIMPER  
 361 analysis. OTUs accounting for 50% of the variance were analyzed (Fig. 4). Response  
 362 patterns for detected OTUs were conserved between RNA and DNA profiles.  
 363 However, while some OTUs responded similarly to urea under varying moisture  
 364 conditions, marked differences were observed with no detectable pattern based on  
 365 taxonomy.

366 OTUs within the Proteobacteria identified in the SIMPER analysis did not  
 367 display a conserved response to urea, however when lower taxonomic levels were  
 368 examined patterns emerged. A consistent positive response was seen for OTUs within  
 369 the class Betaproteobacteria and the family Hyphomicrobiaceae, amongst others.  
 370 Positive responses to urea were also observed at the phylum level for the Firmicutes,  
 371 Bacteroidetes, Actinobacteria, Gemmatimonadetes and Planctomycetes, although the  
 372 level of response varied across lower taxonomic levels. In contrast, with only some  
 373 exceptions, OTUs within the phyla Acidobacteria, Verrucomicrobia, Nitrospirae,  
 374 Candidate Division WS3 (also referred to as candidate phylum Latecomicrobia) and  
 375 the Thaumarchaeota all were negatively impacted by urea deposition.

376 To account for response patterns over time, we focused on OTUs that  
 377 accounted for 30% of the variance in the SIMPER analysis (36 total), with individual



OTU contributions ranging from 5 to 0.1 percent at the DNA level and 5 to 0.06 percent at the RNA level (Table S3). Temporal patterns were conserved between DNA and RNA profiles (Supplementary Fig. S9, S10), despite differences in absolute abundance. Once again, moisture acted as a modulator of response with the extent of impact dependent on the OTU (Fig. 5 and 6). While most functional groups responded immediately (at both DNA and RNA level), positively affected OTU responses were observed along all time points creating a succession of positively selected organisms. In contrast, negatively affected OTUs all responded within the first 2 time points indicating an immediate negative selective pressure (Fig. 6). Large variances in absolute changes were observed, even within similar organisms (e.g. *Pedobacter*), with fold changes ranging from -10.5 to 410 across both positively and negatively affected OTUs. Despite this, OTU response was noted to correspond to taxonomy, with both the effect (positive or negative) and the extent of response (fold change or total abundance) in line with predicted ecological growth strategies (r vs. k) predicted for different taxa. To test this, we predicted rRNA operon copy numbers (rrn) for all 36 OTUs and compared them to the observed maximum abundance, max fold change in population or observed growth rate per day. We consistently observed a non-linear response with an asymptote reached at higher copy numbers (Fig. 7). These trends were consistent independent of which moisture conditions were present at the time of response. To account for preferential response due to moisture, we selected the highest response for each organism and saw no clear difference in patterns. To account for potential biases due to uneven representation, OTUs were grouped into low (1-2 copies of rrn) or high (>2) copy number organisms (Supplementary Table S4). While significant changes ( $p < 0.05$ , Supplementary Fig. S11) were observed in most instances, exceptions were noted (e.g. growth rate under HM).

## 403 Discussion

404 Functional profiling (identification and quantification of specific functional  
405 genes/transcripts) is normally utilized to link chemical transformations to specific  
406 microbial populations capable of catalyzing reactions. However, functional groups are  
407 comprised of taxonomically diverse species of microbes with different lifestyle  
408 strategies that are unlikely to share a conserved response to an ecosystem disturbance  
409 (Ho *et al.* 2012). While functional profiling allows us to measure the net response of a  
410 functional group, and could serve as a proxy for determining the importance of the  
411 group in a sample, it does not identify how specific organisms benefit from a  
412 catalyzed transformation. Here we used a controlled microcosm experiment to  
413 measure the response of soil communities to a disturbance in the form of changes in  
414 moisture and nitrogen (urea) deposition. Functional analysis (qPCR) demonstrated a  
415 biological response to urea, but differing responses to moisture depending on group  
416 (Fig. 1). Responses are potentially linked to different life strategies amongst these  
417 groups. Ammonia oxidizers displayed contrasting population and expression profiles,  
418 suggesting niche differentiation driven by time and/or substrate concentration. AOA  
419 responded early, and declined as new N was made available while AOB responded  
420 later with population swings spanning from near detection limit to most dominant  
421 group. These observations match prior reports showing AOA prefer low N  
422 concentrations, while AOB respond vigorously to N deposition (Di *et al.* 2010;  
423 Sterngren *et al.* 2015). This has been interpreted as evidence for differing lifestyles  
424 for AOB and AOA, with AOA preferring nutrient poor conditions and AOB  
425 dominating in rich ones (Sterngren *et al.* 2015). However, prior assertions that AOB  
426 are solely important for driving nitrification might be overstated given that  
427 transcriptional activity for both groups is comparable if compared at peak time (Di *et*

428 *al.* 2009). This contrasting use of energy between functionally redundant organisms  
 429 might explain the low correlations between processes and the abundance of their  
 430 respective functional populations (Rocca *et al.* 2015). When we examine the response  
 431 of other functional groups benefiting from influxes of N, like denitrifiers, we see no  
 432 significant change in population sizes suggesting that either energy is being utilized  
 433 for physiological maintenance or otherwise for redox balance/homeostasis (Hartsock  
 434 & Shapleigh 2011; Li *et al.* 2012; Dietrich *et al.* 2013). The distinction here being that  
 435 we use the term physiological maintenance as it refers to the state of energetics in a  
 436 cell where the energy consumed is used for functions other than the production of new  
 437 cell material (i.e. growth) (van Bodegom 2007; Lipson 2015). Alternatively, redox  
 438 balance reactions are used to maintain viable metabolic processes by controlling the  
 439 redox state of all the cellular components (Green & Paget 2004). In contrast, organism  
 440 adapted to low N concentrations, like N fixers, decline in response to exogenous N  
 441 demonstrating real time selective pressure in a complex ecosystem. These responses  
 442 also highlight the temporal nature of these relationships and how by following niche  
 443 differentiation high number of functionally redundant organisms can be maintained  
 444 (Stempfhuber *et al.* 2016). However, the use of very high concentrations of urea  
 445 (leading to rapid hydrolysis to ammonium followed by substantial nitrification) has  
 446 major consequences for soil pH, physicochemical parameters, and potentially other  
 447 factors (e.g. osmolarity). Without accounting for those it is unclear what the direct  
 448 mechanism causing an increase or decrease in the relative abundance of a specific  
 449 population is.

450         Despite this, our observations highlight how lifestyle preferences for  
 451 organisms may be reflected in their dominance in the ecosystem. Prior work suggests  
 452 that AOA dominate in soils with low N inputs, but AOB numbers are higher at times

453 of high N loading or in ecosystems with consistent N deposition (Gong *et al.* 2013;  
 454 Venterea *et al.* 2015; Sterngren *et al.* 2015; Li *et al.* 2016). This would suggest that a  
 455 dynamic ecosystem with varying nutrient levels would select for a higher diversity of  
 456 organisms that maintain ecosystem processes stable over time and space (Wang and  
 457 Loreau, 2014). Indeed, our data supports this with alpha diversity (calculated based on  
 458 16S amplicon analysis at both DNA and RNA) decreasing in response to urea. This is  
 459 inconsistent with plant responses to nutrient deposition in which multiple resources  
 460 need to be added to elicit a response (Harpole *et al.* 2016), although contrasting  
 461 results have been observed (Suding *et al.* 2005; Bai *et al.* 2010; Song *et al.* 2011;  
 462 2012). For microbes, high site to site variance is reported (De Schrijver *et al.* 2011;  
 463 Leff *et al.* 2015), but similar negative responses are suggested and could be linked to  
 464 increased competition in the absence of natural ecosystem variability. However, links  
 465 between microbial and plant response suggest interplay between the response of  
 466 macro and microbiota (Zeng *et al.* 2016). While previous work suggests an important  
 467 role for moisture in controlling community composition (Waldrop & Firestone 2006),  
 468 we only observed a modifier role in our experiment.

469 Although broad observations align with ecological theory, precise  
 470 identification of responsive organisms is rarely carried out. Here we note that while at  
 471 phylum level clear responses (+/- fold change) are observed, variance is seen at the  
 472 OTU level suggesting intra-taxonomic (i.e. same phylum but different species or  
 473 OTUs) diversity. We hypothesized this reflects the life history strategies of the  
 474 different organisms. Attempts to link specific transformations to organisms failed,  
 475 potentially due to the succession of functionally redundant organisms that respond at  
 476 different time with non-overlapping optima. That is, while functional gene abundance  
 477 provides the population size of organisms capable of carrying out a process, the group

may be composed of many OTUs with divergent life strategies or metabolic potentials that affect when they can respond. This makes functional gene measurement an average of all OTU subpopulations carrying that gene. However, community response allows us to identify OTUs responsive to N deposition, which when analyzed independently, provides insights into metabolic preferences (i.e. aerobic vs. anaerobic, nitrifier vs. denitrifier) based on time and response to treatments. Taxonomic groups regularly recognized as native to, or abundant in, oligotrophic conditions declined in the presence of urea. Most of these groups are still poorly understood, and included the Acidobacteria, Verrucomicrobia, Nitrospirae, Candidate Division WS3 (also referred to as candidate phylum Latescibacteria) and the Thaumarchaeota. These organisms are predicted to be slow growers with the Thaumarchaeal response confirming the AOA patterns observed at the functional level. In contrast, positively responding organisms are those generally associated with groups considered eutrophic or capable of fast response. This discrepancy based on life history strategies has been proposed and applied to microbes previously, and suggests that an organisms' ability to grow, utilize carbon, generate proteins and efficiently transform resources to biomass, amongst others, is related to its rRNA operon copy number (Klappenbach *et al.* 2000; Stevenson & Schmidt 2004; Dethlefsen & Schmidt 2007; Roller *et al.* 2016). When applied to communities, it is associated with microbial successions in which decreases in copy numbers are associated with later stages of succession including in soils (Nemergut *et al.* 2015). For example, two OTUs matching the Verrucomicrobial OTU DA101 were found to be negatively affected by urea, and at least one was found to be highly abundant under background conditions. DA101 seems to be a common soil (and grassland) organism identified throughout the world (Felske & Akkermans 1998; O'Farrell & Janssen 1999; Brewer *et al.* 2016). Based on

503 growth (Sangwan *et al.* 2005) and genome reconstructions (Brewer *et al.* 2016), these  
504 organisms are predicted to be slow but efficient growers (k strategists). In contrast,  
505 most of the positively affected organisms seemed to possess higher *rrn* copy numbers  
506 and included members of the Proteobacteria and Bacteroidetes in line with prior  
507 predictions (Fierer *et al.* 2007). Statistical analysis supported this interpretation with  
508 low copy numbers (1-2) significantly associated to a negative response to N  
509 deposition, while high copy numbers (>2) were linked to increased capacity for  
510 growth, growth rate and maximum abundance. However, we found a non-linear  
511 relationship between increased *rrn* copy numbers and growth capacity, best fitted by  
512 models reaching an asymptote. These are first order models that suggest that while a  
513 benefit exists where increased copy numbers lead to increased growth rate, after a  
514 certain threshold other variables might limit any benefit. Alternatively, a decrease in  
515 growth rate might be observed with increasing copy numbers once a tradeoff  
516 threshold is passed (Lipson 2015). However, when *rrn* copy numbers are log2  
517 transformed, a significant linear fit was observed as seen in prior studies (Roller *et al.*  
518 2016). In our study these predictions are made complicated due to the observed intra-  
519 taxonomic variance that can arise from the lack of accurate knowledge of copy  
520 numbers for many organisms, or from metabolic plasticity at higher taxonomic levels.  
521 In addition, our analysis focused on N responsive organisms only, and with only 38  
522 identified it indicates that most organisms were neither positively nor negatively  
523 affected. This could explain why certain organisms (e.g. Actinobacteria) expected to  
524 be k strategist, based on their ability to produce secondary metabolites (Abdelmohsen  
525 *et al.* 2015) and compete with other organisms (Barka *et al.* 2015), showed a positive  
526 response to N deposition. Alternatively, the low number of responsive organisms  
527 could indicate that our false discovery rate corrections were too restrictive.

528           These findings help us get closer to understanding not just the metabolic  
529   potential of organisms in soils, but the role specific pathways play for an organism. It  
530   also allows us to understand the repercussion of disturbances and management of soils  
531   on below ground biodiversity. The knowledge gained through these type of  
532   observations, and integration of life history strategies into microbial ecology, will get  
533   us one step closer to microbiome management as part of soil care.

#### 534   **Acknowledgements**

535           This work was funded by the New Zealand Government through the New  
536   Zealand Fund for Global Partnerships in Livestock Emissions Research to support the  
537   objectives of the Livestock Research Group of the Global Research Alliance on  
538   Agricultural Greenhouse Gases (Agreement number: 16084) awarded to SEM and the  
539   University of Otago.

#### 540   **References**

- 541   Abdelmohsen UR, Grkovic T, Balasubramanian S *et al.* (2015) Elicitation of  
542   secondary metabolism in actinomycetes. *Biotechnology Advances*, **33**, 798–811.  
543   Altschul SF, Gish W, Miller W, Myers EW, Lipman DJ (1990) Basic local alignment  
544   search tool. *Journal of Molecular Biology*, **215**, 403–410.  
545   Avrahami S, Liesack W, Conrad R (2003) Effects of temperature and fertilizer on  
546   activity and community structure of soil ammonia oxidizers. *Environmental*  
547   *Microbiology*, **5**, 691–705.  
548   Bai Y, Wu J, Clark CM, Naeem S, Pan Q (2010) Tradeoffs and thresholds in the  
549   effects of nitrogen addition on biodiversity and ecosystem functioning: evidence  
550   from inner Mongolia Grasslands. *Global Change Biology*, **16**, 358–372.  
551   Baral KR, Thomsen AG, Olesen JE, Petersen SO (2014) Controls of nitrous oxide  
552   emission after simulated cattle urine deposition. *Agriculture, Ecosystems &*  
553   *Environment*, **188**, 103–110.  
554   Barka EA, Vatsa P, Sanchez L *et al.* (2015) Taxonomy, Physiology, and Natural  
555   Products of Actinobacteria. *Microbiology and Molecular Biology Reviews*, **80**, 1–  
556   43.  
557   Bayer B, Vojvoda J, Offre P *et al.* (2015) Physiological and genomic characterization  
558   of two novel marine thaumarchaeal strains indicates niche differentiation. **10**,  
559   1051–1063.  
560   Brenzinger K, Dörsch P, Braker G (2015) pH-driven shifts in overall and  
561   transcriptionally active denitrifiers control gaseous product stoichiometry in  
562   growth experiments with extracted bacteria from soil. *Frontiers in microbiology*,  
563   **6**, 1226.  
564   Brewer T, Handley K, Carini P, Gibert J, Fierer N (2016) *Genome reduction in an*



565 *abundant and ubiquitous soil bacterial lineage.*

566 Butterbach-Bahl K, Baggs EM, Dannenmann M, Kiese R, Zechmeister-Boltenstern S

567 (2013) Nitrous oxide emissions from soils: how well do we understand the

568 processes and their controls? *Philosophical Transactions of the Royal Society B:*

569 *Biological Sciences*, **368**, 20130122–20130122.

570 Caporaso JG, Kuczynski J, Stombaugh J *et al.* (2010) QIIME allows analysis of high-

571 throughput community sequencing data. *Nature methods*, **7**, 335–336.

572 Caporaso JG, Lauber CL, Walters WA *et al.* (2012) Ultra-high-throughput microbial

573 community analysis on the Illumina HiSeq and MiSeq platforms. *The ISME*

574 *Journal*, **6**, 1621–1624.

575 Clough, TJ, Lanigan, GJ, de Klein, CAM *et al.* (n.d.). Influence of soil moisture on

576 co-denitrification fluxes from a urea-affected pasture soil. In Review.

577 de Klein CAM, Luo J, Woodward KB *et al.* (2014a) The effect of nitrogen

578 concentration in synthetic cattle urine on nitrous oxide emissions. *Agriculture,*

579 *Ecosystems & Environment*, **188**, 85–92.

580 de Klein CA, Shepherd MA, van der Weerden TJ (2014b) Nitrous oxide emissions

581 from grazed grasslands: interactions between the N cycle and climate change — a

582 New Zealand case study. *Current Opinion in Environmental Sustainability*, **9-10**,

583 131–139.

584 De Schrijver A, De Frenne P, Ampoorter E *et al.* (2011) Cumulative nitrogen input

585 drives species loss in terrestrial ecosystems. *Global Ecology and Biogeography*,

586 **20**, 803–816.

587 Delmont TO, Eren AM, Maccario L *et al.* (2015) Reconstructing rare soil microbial

588 genomes using in situ enrichments and metagenomics. *Frontiers in microbiology*,

589 **6**, 1–15.

590 Dethlefsen L, Schmidt TM (2007) Performance of the translational apparatus varies

591 with the ecological strategies of bacteria. *Journal of bacteriology*, **189**, 3237–

592 3245.

593 Di HJ, Cameron KC, Shen JP *et al.* (2009) Nitrification driven by bacteria and not

594 archaea in nitrogen-rich grassland soils. *Nature Geoscience*, **2**, 621–624.

595 Di HJ, Cameron KC, Shen J-P *et al.* (2010) Ammonia-oxidizing bacteria and archaea

596 grow under contrasting soil nitrogen conditions. *FEMS Microbiology Ecology*, **72**,

597 386–394.

598 Dietrich LEP, Okegbe C, Price-Whelan A *et al.* (2013) Bacterial Community

599 Morphogenesis Is Intimately Linked to the Intracellular Redox State. *Journal of*

600 *bacteriology*, **195**, 1371–1380.

601 Edgar RC (2010) Search and clustering orders of magnitude faster than BLAST.

602 *Bioinformatics*, **26**, 2460–2461.

603 Felske, Akkermans (1998) Prominent occurrence of ribosomes from an uncultured

604 bacterium of the Verrucomicrobiales cluster in grassland soils. *Letters in applied*

605 *microbiology*, **26**, 219–223.

606 Fierer N, Bradford MA, Jackson RB (2007) Toward an ecological classification of

607 soil bacteria. *Ecology*, **88**, 1354–1364.

608 Gardiner MJ, Radford T (1980) *Soil associations of Ireland and their land use*

609 *potential: explanatory bulletin to soil map of Ireland 1980*. An Foras Taluntais

610 Dublin.

611 Gong P, Zhang L, Wu Z, Shang Z, Li D (2013) Does the nitri cation inhibitor

612 dicyandiamide affect the abundance of ammonia-oxidizing bacteria and archaea

613 in a Hap-Udic Luvisol? *Journal of Soil Science and Plant Nutrition*, **13**, 35–42.

614 Green J, Paget MS (2004) Bacterial redox sensors. *Nature reviews microbiology*, **2**,



- 615 954–966.
- 616 Gubry-Rangin C, Kratsch C, Williams TA *et al.* (2015) Coupling of diversification
- 617 and pH adaptation during the evolution of terrestrial Thaumarchaeota.
- 618 *Proceedings of the National Academy of Sciences*, **112**, 9370–9375.
- 619 Hamonts K, Balaine N, Moltchanova E *et al.* (2013) Influence of soil bulk density and
- 620 matric potential on microbial dynamics, inorganic N transformations, N<sub>2</sub>O and N<sub>2</sub>
- 621 fluxes following urea deposition. *Soil Biology & Biochemistry*, **65**, 1–11.
- 622 Harpole WS, Sullivan LL, Lind EM *et al.* (2016) Addition of multiple limiting
- 623 resources reduces grassland diversity. *Nature*, **537**, 93–96.
- 624 Hartman AL, Lough DM, Barupal DK *et al.* (2009) Human gut microbiome adopts an
- 625 alternative state following small bowel transplantation. *Proceedings of the*
- 626 *National Academy of Sciences*, **106**, 17187–17192.
- 627 Hartsock A, Shapleigh JP (2011) Physiological Roles for Two Periplasmic Nitrate
- 628 Reductases in *Rhodobacter sphaeroides* 2.4.3 (ATCC 17025). *Journal of*
- 629 *bacteriology*, **193**, 6483–6489.
- 630 Hatzenpichler R (2012) Diversity, physiology, and niche differentiation of ammonia-
- 631 oxidizing archaea. *Applied and Environmental Microbiology*, **78**, 7501–7510.
- 632 Henry S, Bru D, Stres B, Hallet S, Philippot L (2006) Quantitative detection of the
- 633 *nosZ* gene, encoding nitrous oxide reductase, and comparison of the abundances
- 634 of 16S rRNA, *narG*, *nirK*, and *nosZ* genes in soils. *Applied and Environmental*
- 635 *Microbiology*, **72**, 5181–5189.
- 636 Herrero M, Henderson B, Havlík P *et al.* (2016) Greenhouse gas mitigation potentials
- 637 in the livestock sector. *Nature Climate Change*, **6**, 452–461.
- 638 Ho A, Kerckhof F-M, Luke C *et al.* (2012) Conceptualizing functional traits and
- 639 ecological characteristics of methane-oxidizing bacteria as life strategies.
- 640 *Environmental Microbiology Reports*, **5**, 335–345.
- 641 Jia Z, Conrad R (2009) Bacteria rather than Archaea dominate microbial ammonia
- 642 oxidation in an agricultural soil. *Environmental Microbiology*, **11**, 1658–1671.
- 643 Klappenbach JA, Dunbar JM, Schmidt TM (2000) rRNA Operon Copy Number
- 644 Reflects Ecological Strategies of Bacteria. *Applied and Environmental*
- 645 *Microbiology*, **66**, 1328–1333.
- 646 Leff JW, Jones SE, Prober SM *et al.* (2015) Consistent responses of soil microbial
- 647 communities to elevated nutrient inputs in grasslands across the globe.
- 648 *Proceedings of the National Academy of Sciences*, **112**, 10967–10972.
- 649 Leininger S, Urich T, Schlöter M *et al.* (2006) Archaea predominate among ammonia-
- 650 oxidizing prokaryotes in soils. *Nature*, **442**, 806–809.
- 651 Li C, Di HJ, Cameron KC, Podolyan A, Zhu B (2016) Effect of different land use and
- 652 land use change on ammonia oxidiser abundance and N<sub>2</sub>O emissions. *Soil Biology*
- 653 *& Biochemistry*, **96**, 169–175.
- 654 Li Y, Katzmann E, Borg S, Schuler D (2012) The Periplasmic Nitrate Reductase Nap
- 655 Is Required for Anaerobic Growth and Involved in Redox Control of Magnetite
- 656 Biomineralization in *Magnetospirillum gryphiswaldense*. *Journal of bacteriology*,
- 657 **194**, 4847–4856.
- 658 Lipson DA (2015) The complex relationship between microbial growth rate and yield
- 659 and its implications for ecosystem processes. *Frontiers in microbiology*, **6**, 1–5.
- 660 Liu B, Liu B, Frostegård Å *et al.* (2014) Impaired Reduction of N<sub>2</sub>O to N<sub>2</sub> in Acid
- 661 Soils Is Due to a Posttranscriptional Interference with the Expression of *nosZ*.
- 662 *mBio*, **5**, e01383–14–e01383–14.
- 663 Liu B, Mørkved PT, Frostegård Å, Bakken LR (2010) Denitrification gene pools,
- 664 transcription and kinetics of NO, N<sub>2</sub>O and N<sub>2</sub> production as affected by soil

665 pH. *FEMS Microbiology Ecology*, **72**, 407–417.

666 McMurdie PJ, Holmes S (2013) phyloseq: an R package for reproducible interactive  
667 analysis and graphics of microbiome census data. *PLoS ONE*.

668 Morales SE, Holben WE (2013) Functional response of a near-surface soil microbial  
669 community to a simulated underground CO<sub>2</sub> storage leak (MR Mormile, Ed.).  
670 *PLoS ONE*, **8**, e81742–10.

671 Nemergut DR, Knelman JE, Ferrenberg S *et al.* (2015) Decreases in average bacterial  
672 community rRNA operon copy number during succession. **10**, 1147–1156.

673 Nicol GW, Leininger S, Schleper C, Prosser JI (2008) The influence of soil pH on the  
674 diversity, abundance and transcriptional activity of ammonia oxidizing archaea  
675 and bacteria. *Environmental Microbiology*, **10**, 2966–2978.

676 Oksanen J, Blanchet FG, Kindt R, Legendre P *Vegan: Community Ecology Package*  
677 (2013) R package version 2.0-7. <https://cran.r-project.org/package=vegan>.

678 O’Farrell KA, Janssen PH (1999) Detection of Verrucomicrobia in a Pasture Soil by  
679 PCR-Mediated Amplification of 16S rRNA Genes. *Applied and Environmental*  
680 *Microbiology*, **65**, 4280–4284.

681 Pratscher J, Dumont MG, Conrad R (2011) Ammonia oxidation coupled to CO<sub>2</sub>  
682 fixation by archaea and bacteria in an agricultural soil. In:, pp. 4170–4175.

683 Prosser JI, Nicol GW (2012) Archaeal and bacterial ammonia-oxidisers in soil: the  
684 quest for niche specialisation and differentiation. *Trends in Microbiology*, **20**,  
685 523–531.

686 Quast C, Pruesse E, Yilmaz P *et al.* (2012) The SILVA ribosomal RNA gene database  
687 project: improved data processing and web-based tools. *Nucleic Acids Research*,  
688 **41**, D590–D596.

689 R Development Core Team (2008) R: A language and environment for statistical  
690 computing. *R Foundation for Statistical Computing, Vienna, Austria*.

691 Rinke C, Schwientek P, Sczyrba A *et al.* (2013) Insights into the phylogeny and  
692 coding potential of microbial dark matter. *Nature*, **499**, 431–437.

693 Rocca JD, Hall EK, Lennon JT *et al.* (2015) Relationships between protein-encoding  
694 gene abundance and corresponding process are commonly assumed yet rarely  
695 observed. **9**, 1693–1699.

696 Roller BRK, Stoddard SF, Schmidt TM (2016) Exploiting rRNA operon copy number  
697 to investigate bacterial reproductive strategies. *Nature Microbiology*, 1–7.

698 Rotthauwe JH, Witzel KP, Liesack W (1997) The ammonia monooxygenase  
699 structural gene *amoA* as a functional marker: molecular fine-scale analysis of  
700 natural ammonia-oxidizing populations. *Applied and Environmental*  
701 *Microbiology*, **63**, 4704–4712.

702 Rösch C, Bothe H (2005) Improved assessment of denitrifying, N<sub>2</sub>-fixing, and total-  
703 community bacteria by terminal restriction fragment length polymorphism  
704 analysis using multiple restriction enzymes. *Applied and Environmental*  
705 *Microbiology*, **71**, 2026–2035.

706 Saggar S, Jha N, Deslippe J *et al.* (2013) Denitrification and N<sub>2</sub>O:N<sub>2</sub> production in  
707 temperate grasslands: Processes, measurements, modelling and mitigating  
708 negative impacts. *Science of The Total Environment*, **465**, 173–195.

709 Sangwan P, Kovac S, Davis KER, Sait M, Janssen PH (2005) Detection and  
710 cultivation of soil verrucomicrobia. *Applied and Environmental Microbiology*, **71**,  
711 8402–8410.

712 Song L, Bao X, Liu X, Zhang F (2012) Impact of nitrogen addition on plant  
713 community in a semi-arid temperate steppe in China. *Journal of Arid Land*, **4**, 3–  
714 10.

715 Song L, Bao X, Liu X *et al.* (2011) Nitrogen enrichment enhances the dominance of  
716 grasses over forbs in a temperate steppe ecosystem. *Biogeosciences*, **8**, 2341–  
717 2350.

718 Spiro S (2012) Nitrous oxide production and consumption: regulation of gene  
719 expression by gas-sensitive transcription factors. *Philosophical Transactions of*  
720 *the Royal Society B: Biological Sciences*, **367**, 1213–1225.

721 Stahl DA, la Torre de JR (2012) Physiology and diversity of ammonia-oxidizing  
722 archaea. *Annual Review of Microbiology*, **66**, 83–101.

723 Stempfhuber B, Richter-Heitmann T, Regan KM *et al.* (2016) Spatial Interaction of  
724 Archaeal Ammonia-Oxidizers and Nitrite-Oxidizing Bacteria in an Unfertilized  
725 Grassland Soil. *Frontiers in microbiology*, **6**, 861–15.

726 Sterngren AE, Hallin S, Bengtson P (2015) Archaeal ammonia oxidizers dominate in  
727 numbers, but bacteria drive gross nitrification in N-amended grassland soil.  
728 *Frontiers in microbiology*, **6**, 1620–8.

729 Stevenson BS, Schmidt TM (2004) Life History Implications of rRNA Gene Copy  
730 Number in *Escherichia coli*. *Applied and Environmental Microbiology*, **70**, 6670–  
731 6677.

732 Stoddard SF, Smith BJ, Hein R, Roller BRK, Schmidt TM (2015) rrnDB: improved  
733 tools for interpreting rRNA gene abundance in bacteria and archaea and a new  
734 foundation for future development. *Nucleic Acids Research*, **43**, D593–D598.

735 Suding KN, Collins SL, Gough L *et al.* (2005) Functional- and abundance-based  
736 mechanisms explain diversity loss due to N fertilization. *Proceedings of the*  
737 *National Academy of Sciences*, **102**, 4387–4392.

738 Suzuki R, Shimodaira H (2006) Pvcust: an R package for assessing the uncertainty in  
739 hierarchical clustering. *Bioinformatics*, **22**, 1540–1542.

740 Taylor AE, Zeglin LH, Wanzek TA, Myrold DD, Bottomley PJ (2012) Dynamics of  
741 ammonia-oxidizing archaea and bacteria populations and contributions to soil  
742 nitrification potentials. **6**, 2024–2032.

743 Throbäck IN, Enwall K, Jarvis Å, Hallin S (2004) Reassessing PCR primers targeting  
744 *nirS*, *nirK* and *nosZ* genes for community surveys of denitrifying bacteria with  
745 DGGE. *FEMS Microbiology Ecology*, **49**, 401–417.

746 Tourna M, Freitag TE, Nicol GW, Prosser JI (2008) Growth, activity and temperature  
747 responses of ammonia-oxidizing archaea and bacteria in soil microcosms.  
748 *Environmental Microbiology*, **10**, 1357–1364.

749 van Bodegom P (2007) Microbial Maintenance: A Critical Review on Its  
750 Quantification. *Microbial Ecology*, **53**, 513–523.

751 Venterea RT, Clough TJ, Coulter JA *et al.* (2015) Ammonium sorption and ammonia  
752 inhibition of nitrite-oxidizing bacteria explain contrasting soil N<sub>2</sub>O production.  
753 *Scientific Reports*, **5**, 12153–15.

754 Waldrop MP, Firestone MK (2006) Response of microbial community composition  
755 and function to soil climate change. *Microbial Ecology*, **52**, 716–724.

756 Wei W, Isobe K, Nishizawa T *et al.* (2015) Higher diversity and abundance of  
757 denitrifying microorganisms in environments than considered previously. 1–12.

758 Yergeau E, Kang S, He Z, Zhou J, Kowalchuk GA (2007) Functional microarray  
759 analysis of nitrogen and carbon cycling genes across an Antarctic latitudinal  
760 transect. **1**, 163–179.

761 Zeng J, Liu X, Song L *et al.* (2016) Nitrogen fertilization directly affects soil bacterial  
762 diversity and indirectly affects bacterial community composition. *Soil Biology &*  
763 *Biochemistry*, **92**, 41–49.

764

# Figures

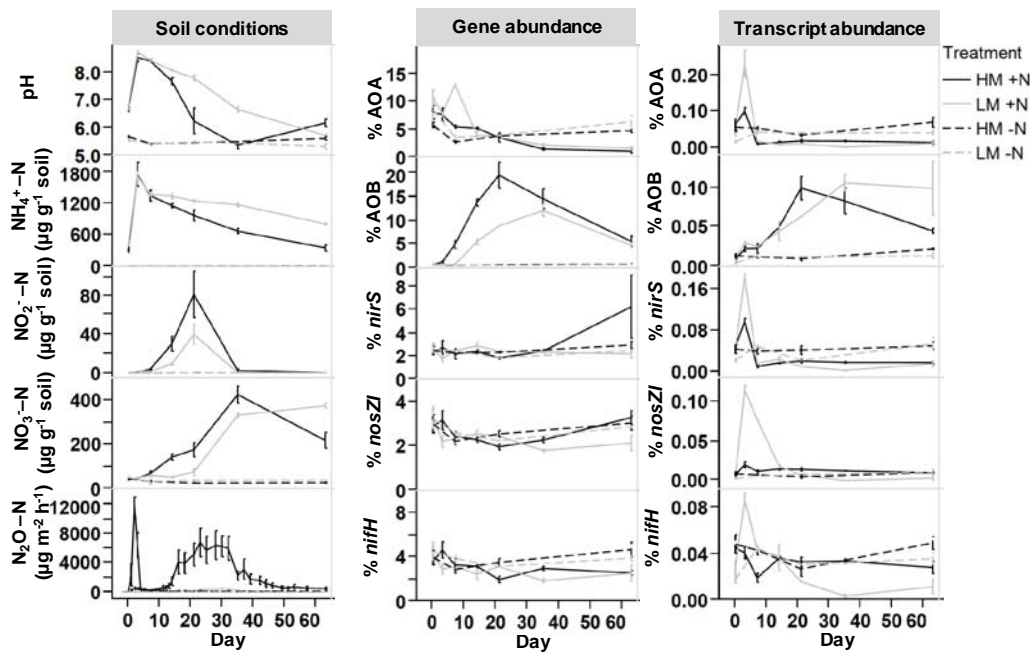

**Fig. 1** Chemical transformations and biological (functional group) response in soils treated with urea (+/- 1000 µg N/g dry soil) under two moisture conditions (LM = low moisture [-10kPa]; HM = high moisture [-1.0kPa]). Error bars are the standard error of the mean (n ≥ 3, except gene abundance data of day 7 [n=1; LM soil] and day 21 [n=1; LM soil]) for replicate mesocosms. Gene and transcript abundance were measured by qPCR targeting: nitrifiers (AOA, ammonia oxidizing archaea; AOB, ammonia oxidizing bacteria), denitrifiers (*nirS*, cytochrome cd<sub>1</sub>-containing nitrite reductase; *nosZI*, nitrous oxide reductase) and nitrogen fixers (*nifH*, nitrogenase reductase). All qPCR results are normalized to 16S rRNA copy numbers and presented as percent of the nucleic acid pool.

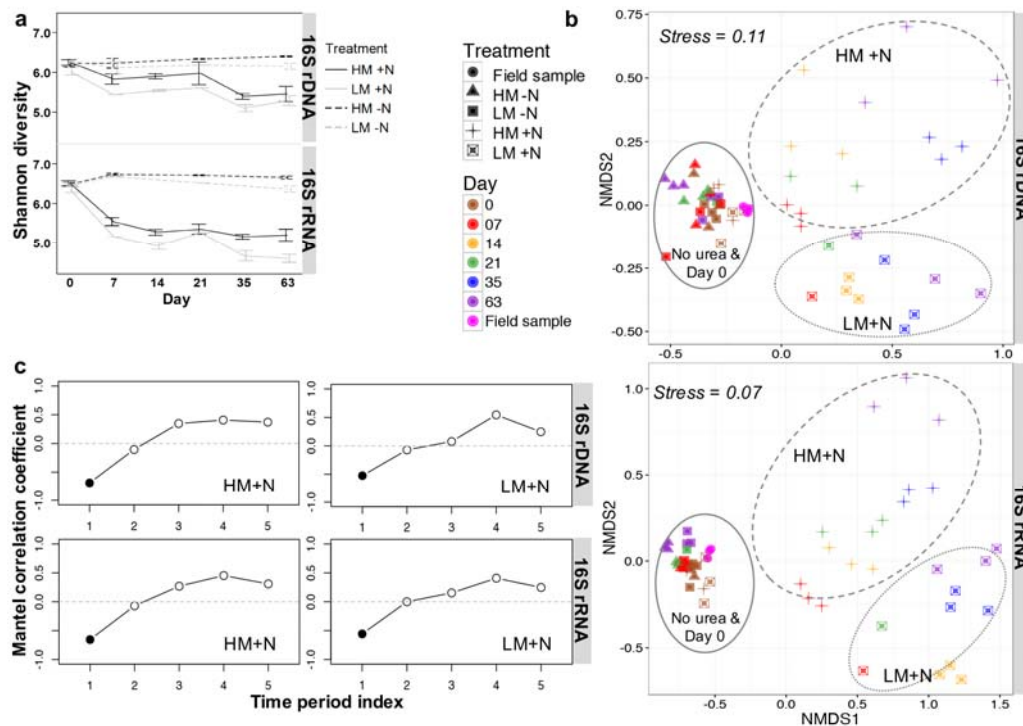

**Fig. 2** Total microbial community response (based on 16S rRNA gene amplicon profiling and clustering of sequences at OTU level (97% sequence similarity)) to urea (+/-1000  $\mu\text{g N/g dry soil}$ ) under two moisture conditions (LM = low moisture [-10kPa]; HM = high moisture [-1.0kPa]) at both DNA and RNA level. Error bars are the standard error of the mean ( $n = 3$ , except day 7 [ $n=1$ ; LM soil] and day 21 [ $n=1$ ; LM soil]) for replicate mesocosms. (a) Changes in microbial diversity (Shannon) index over time in response to treatment. (b) Non-metric multidimensional scaling (NMDS) ordination plots based on Bray-Curtis distances showing relationships among samples based on OTU level changes in community composition. (c) Mantel correlogram showing autocorrelation on community composition by performing sequential Mantel tests between the Bray-Curtis dissimilarities and the grouping of samples using a time period index (index 1 represents 0-7 days; 2 represents 7-14; 3 represents 14-21; 4 represents 21-35; 5 represents 35-63). Filled circles represent significant correlation ( $p < 0.05$ ) in community composition at specific time periods, with open circles indicating no significant correlation.



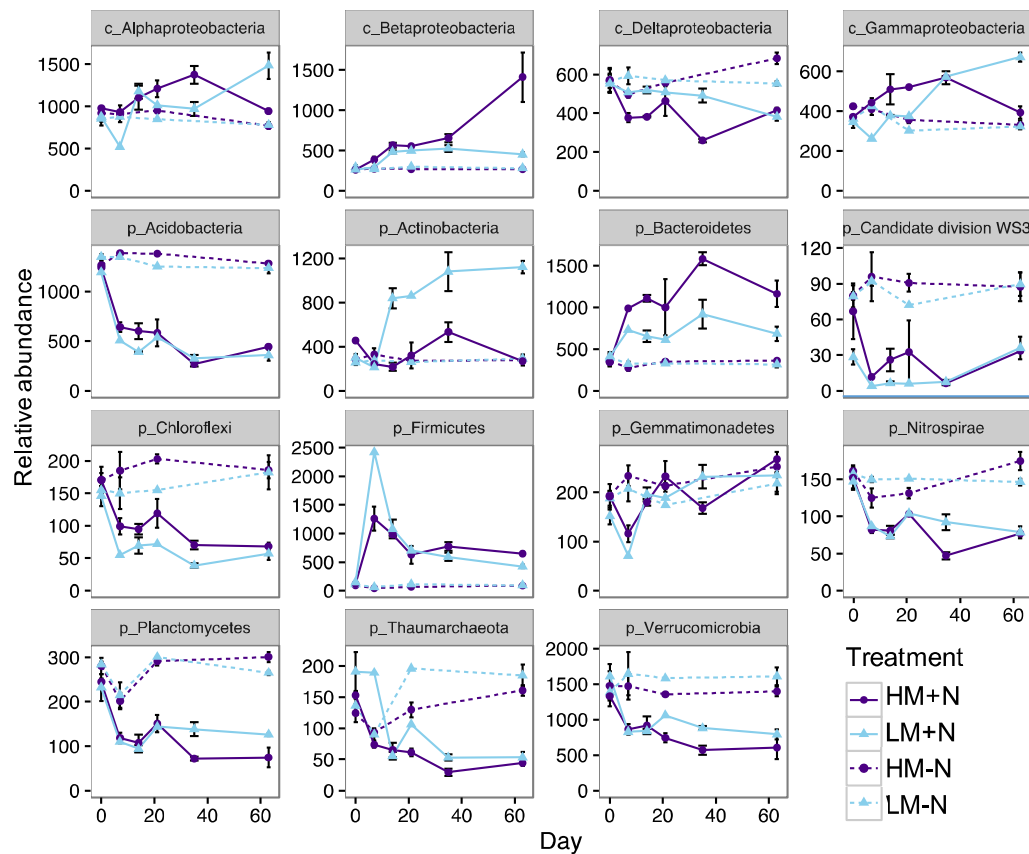

**Fig. 3** Phylum and class level (for Proteobacteria only) changes in abundance (DNA) representing relative contribution >1% of all detected phyla (based on OTUs clustered at 97% sequence similarity). A total of 7,400 sequences were examined per sample. Error bars are the standard error of the mean (n = 3, except day 7 [n=1; LM soil] and day 21 [n=1; LM soil]) for replicate mesocosms. Treatments = +/- N [±1000 µg N/g dry soil] under two moisture conditions (LM = low moisture [-10kPa]; HM = high moisture [-1.0kPa]). Abbreviations: c: Class; p: Phylum. See supplemental Fig. S8 for relative abundance

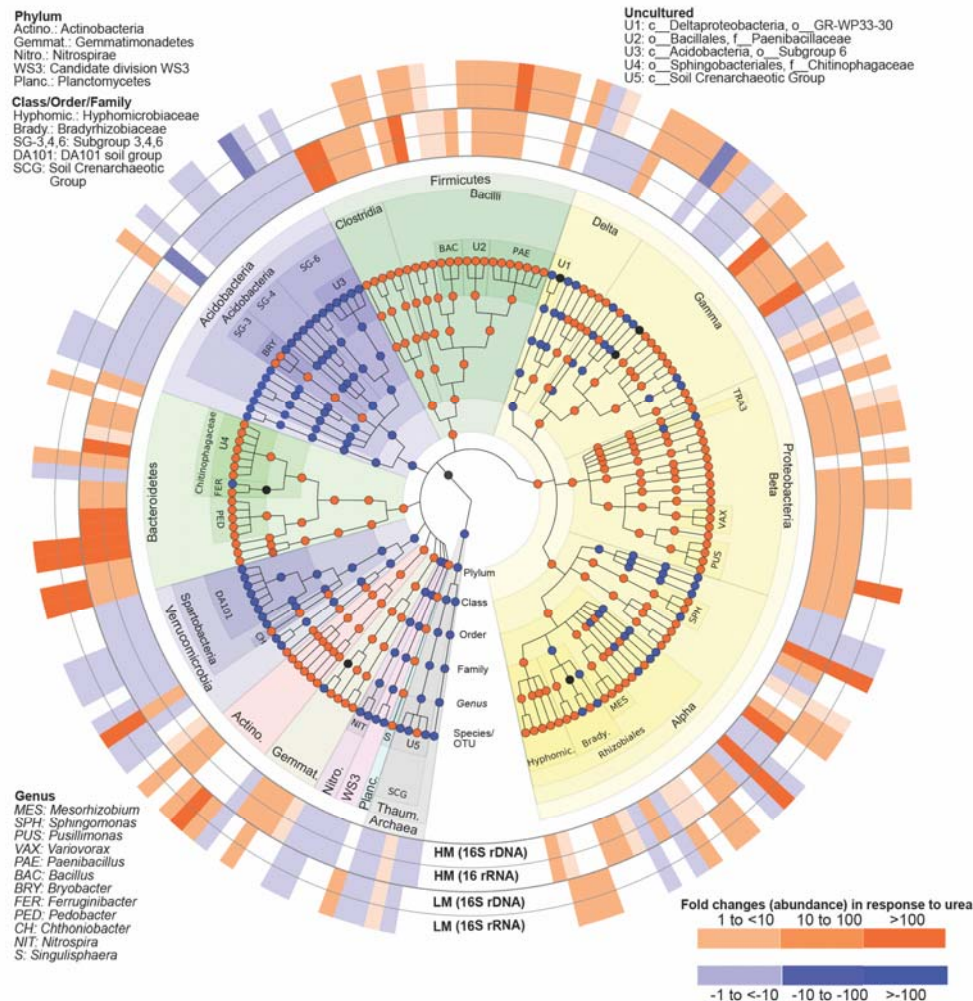

814

815 **Fig. 4** Taxonomic summary of OTUs responsive to urea treatment identified through  
 816 similarity percentages (SIMPER) analysis (representing top 50% cumulative sum).  
 817 The 4 outer rings represent fold changes in response to urea under high and low  
 818 moisture content (MH & LM respectively) at either DNA or RNA level, with blank  
 819 gaps indicating OTUs not identified in SIMPER analysis under the specified ring  
 820 condition. Nodes on the tree (moving outwards from center) correspond to taxonomic  
 821 level [Domain, Phylum, Class, Order, Family, Genus and Species/OTUs]. Nodes are  
 822 colored based on dominant response (>50% conserved fold change response across  
 823 OTUs within a node) with black nodes indicating equal representation of positive and  
 824 negatively responding OTUs. Shaded areas of branches delineate defined taxonomic  
 825 groups. See Supplementary file (Table S3) for full classification.  
 826

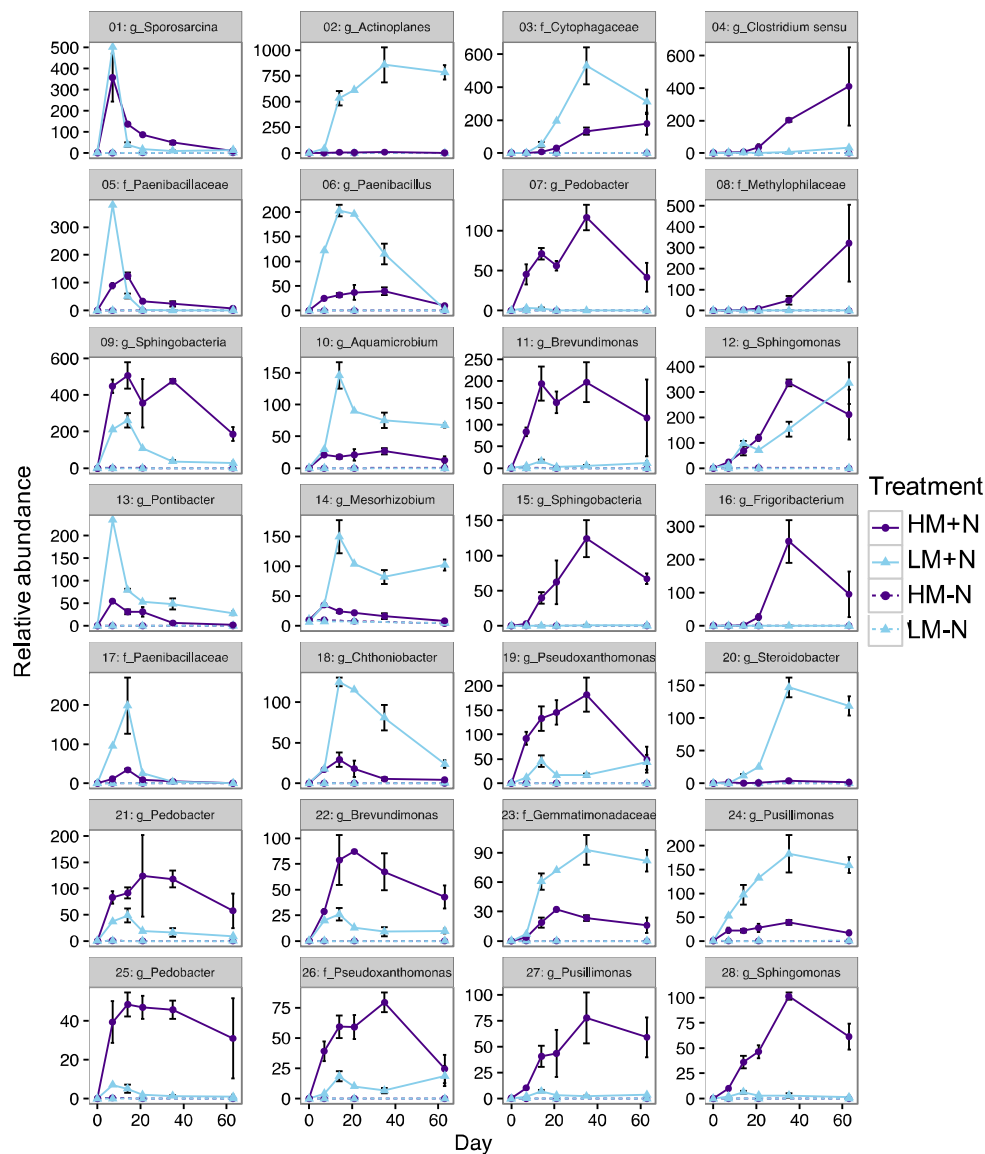

**Fig. 5** Population (16S rDNA) changes (abundance based on 7400 reads per samples) for OTUs identified as positively responsive to urea treatment based on similarity percentages (SIMPER) analysis (representing top 30% cumulative sum). Treatments = +/- N [+/-1000 µg N/g dry soil] under two moisture conditions (LM = low moisture [-10kPa]; HM = high moisture [-1.0kPa]).



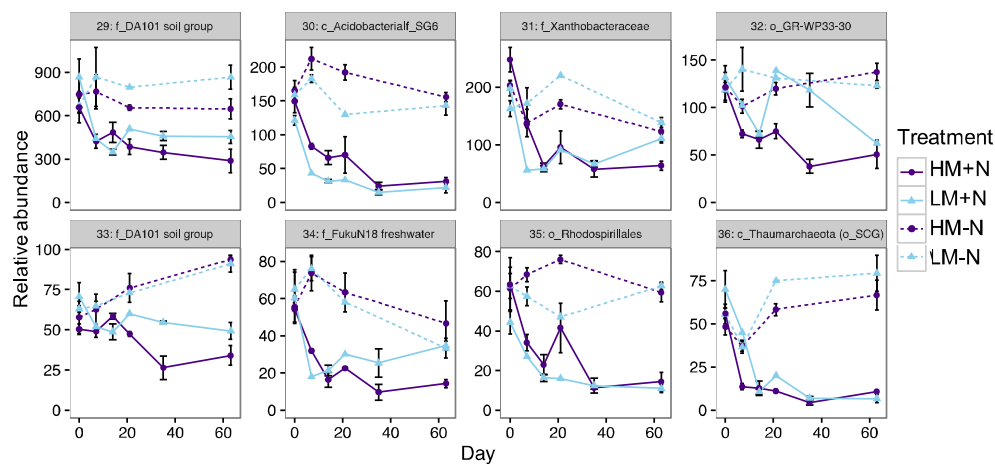

**Fig. 6** Population (16S rDNA) changes (abundance based on 7,400 reads per samples) for OTUs identified as negatively responsive to urea treatment based on similarity percentages (SIMPER) analysis (representing top 30% cumulative sum). Treatments = +/- N [+/-1000  $\mu$ g N/g dry soil] under two moisture conditions (LM = low moisture [-10kPa]; HM = high moisture [-1.0kPa]).

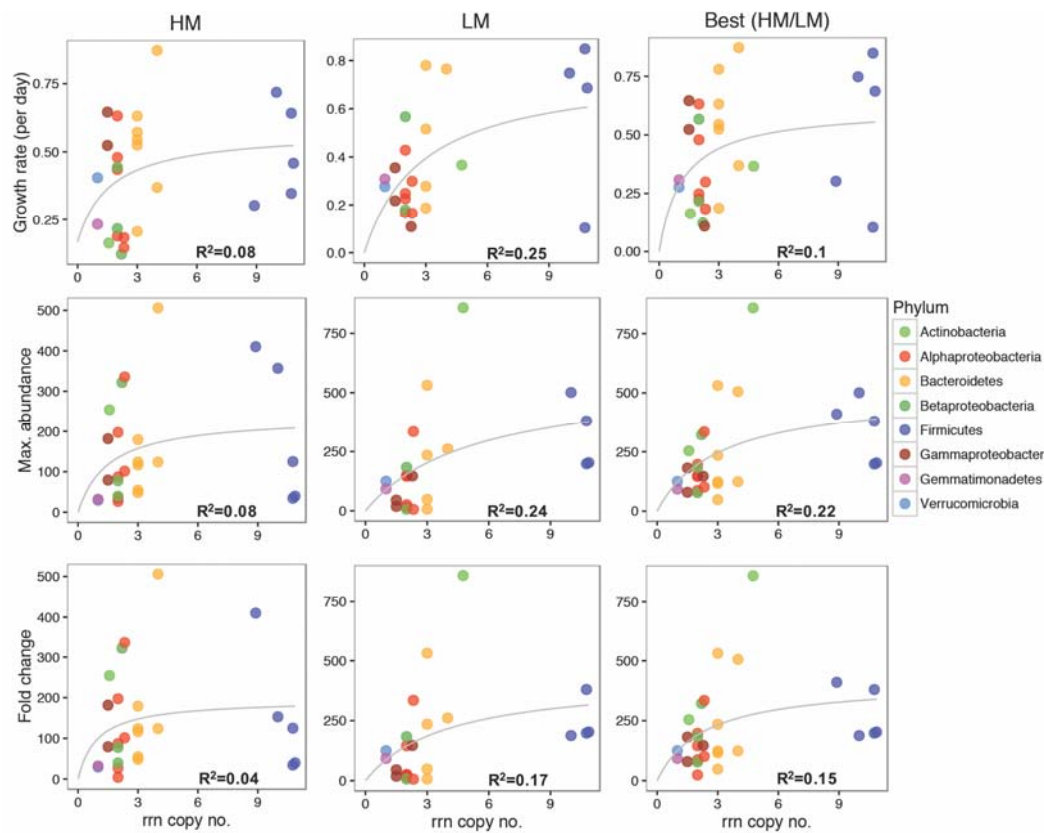

**Fig. 7** Relationship between predicted ribosomal RNA operon (rrn) copy numbers and growth rate (per day), maximum observed population change, or fold change in response to N treatment under both high moisture (HM) content, low moisture (LM) content and best growth either in HM or in LM (based on maximum observed growth). Copy number was estimated using rrn database (Stoddard *et al.* 2015). Copy number values were obtained by finding the closest match (lowest taxonomic level possible) to each OTU and retrieving the mean rRNA copy number for that group.

## 876 **Supporting information**

877 **Fig. S1** N<sub>2</sub>O response in soils treated with urea (+/- 1000 µg N/g dry soil) under two  
878 moisture conditions (LM = low moisture [-10kPa]; HM = high moisture [-1.0kPa]).

879 Error bars are the standard error of the mean ( $n \geq 3$ ) for replicate mesocosms.

880 **Fig. S2** Functional group response (absolute quantification) in soils treated with urea  
881 (+/-1000 µg N/g dry soil) under two moisture conditions (LM = low moisture [-  
882 10kPa]; HM = high moisture [-1.0kPa]). Gene and transcript abundance were  
883 measured from DNA template (1 ng of DNA) and cDNA template (1 ng RNA). Error  
884 bars are the standard error of the mean ( $n = 3$ , except day 7 [ $n=1$ ; LM soil] and day 21  
885 [ $n=1$ ; LM soil]) for replicate mesocosms. Absolute gene and transcript abundance  
886 were measured by qPCR targeting: 16S (total prokaryotic community), nitrifiers  
887 (AOA, ammonia oxidizing archaea; AOB, ammonia oxidizing bacteria), denitrifiers  
888 (*nirS*, cytochrome *cd*<sub>1</sub>-containing nitrite reductase; *nosZI*, nitrous oxide reductase)  
889 and nitrogen fixers (*nifH*, nitrogenase reductase).

890 **Fig. S3** Changes in microbial a) Richness and b) Evenness (Pielou's) over time in  
891 response to treatment.

892 **Fig. S4** Stress plots for Fig. 2b.

893 **Fig. S5** Pvcust tree displaying sample clustering based on Bray-Curtis distances  
894 calculated from 16S rRNA gene community composition and indicating significant  
895 clusters based on p values ([AU (approximately unbiased) BP (bootstrap  
896 probability)]) for each node. Red boxes mark clusters with 95% confidence. Bootstrap  
897 replication ( $n=1000$ ). Two clusters: with urea (light red box) and no urea + day 0 N  
898 treated samples (light green box).

899 **Fig. S6** Mantel correlogram showing autocorrelation on community composition by  
900 performing sequential Mantel tests between the Bray-Curtis dissimilarities and the

grouping of samples using a time period index (index 1 represents 0-7 days; 2 represents 7-21; 3 represents 21-63). Opened circles represent no significant correlations ( $p > 0.05$ ) in community composition at specific time periods.

**Fig. S7** Changes in abundance (DNA), activity (RNA) and RNA/DNA ratio for phyla, or classes, representing top 11 phyla (based on OTUs clustered at 97% sequence similarity). A total of 7,400 sequences were examined per sample. Error bars are the standard error of the mean ( $n = 3$ , except day 7 [ $n=1$ ; LM soil] and day 21 [ $n=1$ ; LM soil]) for replicate mesocosms. Treatments = +/- N [ $\pm 1000 \mu\text{g N/g dry soil}$ ] under two moisture conditions (LM = low moisture [-10kPa]; HM = high moisture [-1.0kPa]). Abbreviations: Firmi., Firmicutes; Verru., Verrucomicrobia; Bact., Bacteroidetes; Acido., Acidobacteria; Actino., Actinobacteria; Planct., Planctomycetes; Gemma., Gemmatimonadetes; Thaum., Thaumarchaeota; Chloro., Chloroflexi, Nitro., Nitrospirae.

**Fig. S8** Phylum level changes (relative abundance) in genome (16S rDNA) and transcript (16S rRNA) levels representing relative contribution  $>1\%$  of all detected phyla (based on OTUs clustered at 97% sequence similarity). A total of 7,400 sequences were examined per sample. Treatments = +/- N [ $\pm 1000 \mu\text{g N/g dry soil}$ ] under two moisture conditions (LM = low moisture [-10kPa]; HM = high moisture [-1.0kPa]).

**Fig. S9** Transcriptional (16S rRNA) and population (16S rDNA) changes (absolute abundance based on 7400 reads per samples) for OTUs identified as positively responsive to urea treatment based on similarity percentage (SIMPER) analysis (representing top 30% cumulative sum). Treatments = +/- N [ $\pm 1000 \mu\text{g N/g dry soil}$ ] under two moisture conditions (LM = low moisture [-10kPa]; HM = high moisture [-1.0kPa]).

**Fig. S10** Transcriptional (16S rRNA) and population (16S rDNA) changes (absolute abundance based on 7400 reads per samples) for OTUs identified as negatively responsive to urea treatment based on similarity percentage (SIMPER) analysis (representing top 30% cumulative sum). Treatments = +/- N [+/- 1000 µg N (urea)/g dry soil] under two moisture conditions (LM = low moisture [-10kPa]; HM = high moisture [-1.0kPa]).

**Fig. S11** Relationship between predicted ribosomal RNA operon (rrn) copy numbers and observed growth rate (per day), maximum observed population change, or fold change in population abundance for OTUs responsive to N treatment under both high moisture (HM) content. Copy number was estimated using rrn database (Stoddard *et al.* 2015). Predicted rrn copy numbers represent the mean rRNA copy number for the closest taxonomic match (at the lowest taxonomic level possible) for each OTU. The rrn copy numbers were log2 transformed before linear regression analysis. Significant “p” value is marked with an asterisk (\*p<0.05; \*\*p<0.01; \*\*\*p<0.001)

**Table S1** Primer pairs used in this study

**Table S2** Pairwise correlation between observed phylum (or class) abundance at DNA and RNA level for urea (+N) treated soils. Correlation analysis was done between DNA (16S rDNA) and RNA (16S rRNA) samples based on mean absolute abundance (per 7,400 sequence reads) at each time point (day 0, 7, 14, 21, 35, 63). Only Proteobacteria shown at class level.

**Table S3** Top OTUs cumulatively contributing 50% of the variance between groups (+Urea; -Urea) at 16S rDNA and 16S rRNA levels based on SIMPER analysis.

**Table S4:** Two sample t-test for mean comparison between low copy number rrn (rRNA operon) samples (1-2) and high copy number of rrn samples (>2). The significant correlation (p<0.05) are showed as bold.
